# Supplementary material for: Repetitive elements as a transcriptomic marker of aging: Evidence in multiple datasets and models
Source: PubMed Central journal article supplement (PMC7412685; doi:10.1111/acel.13167), 2020-06-05

Supporting Information Figure S1

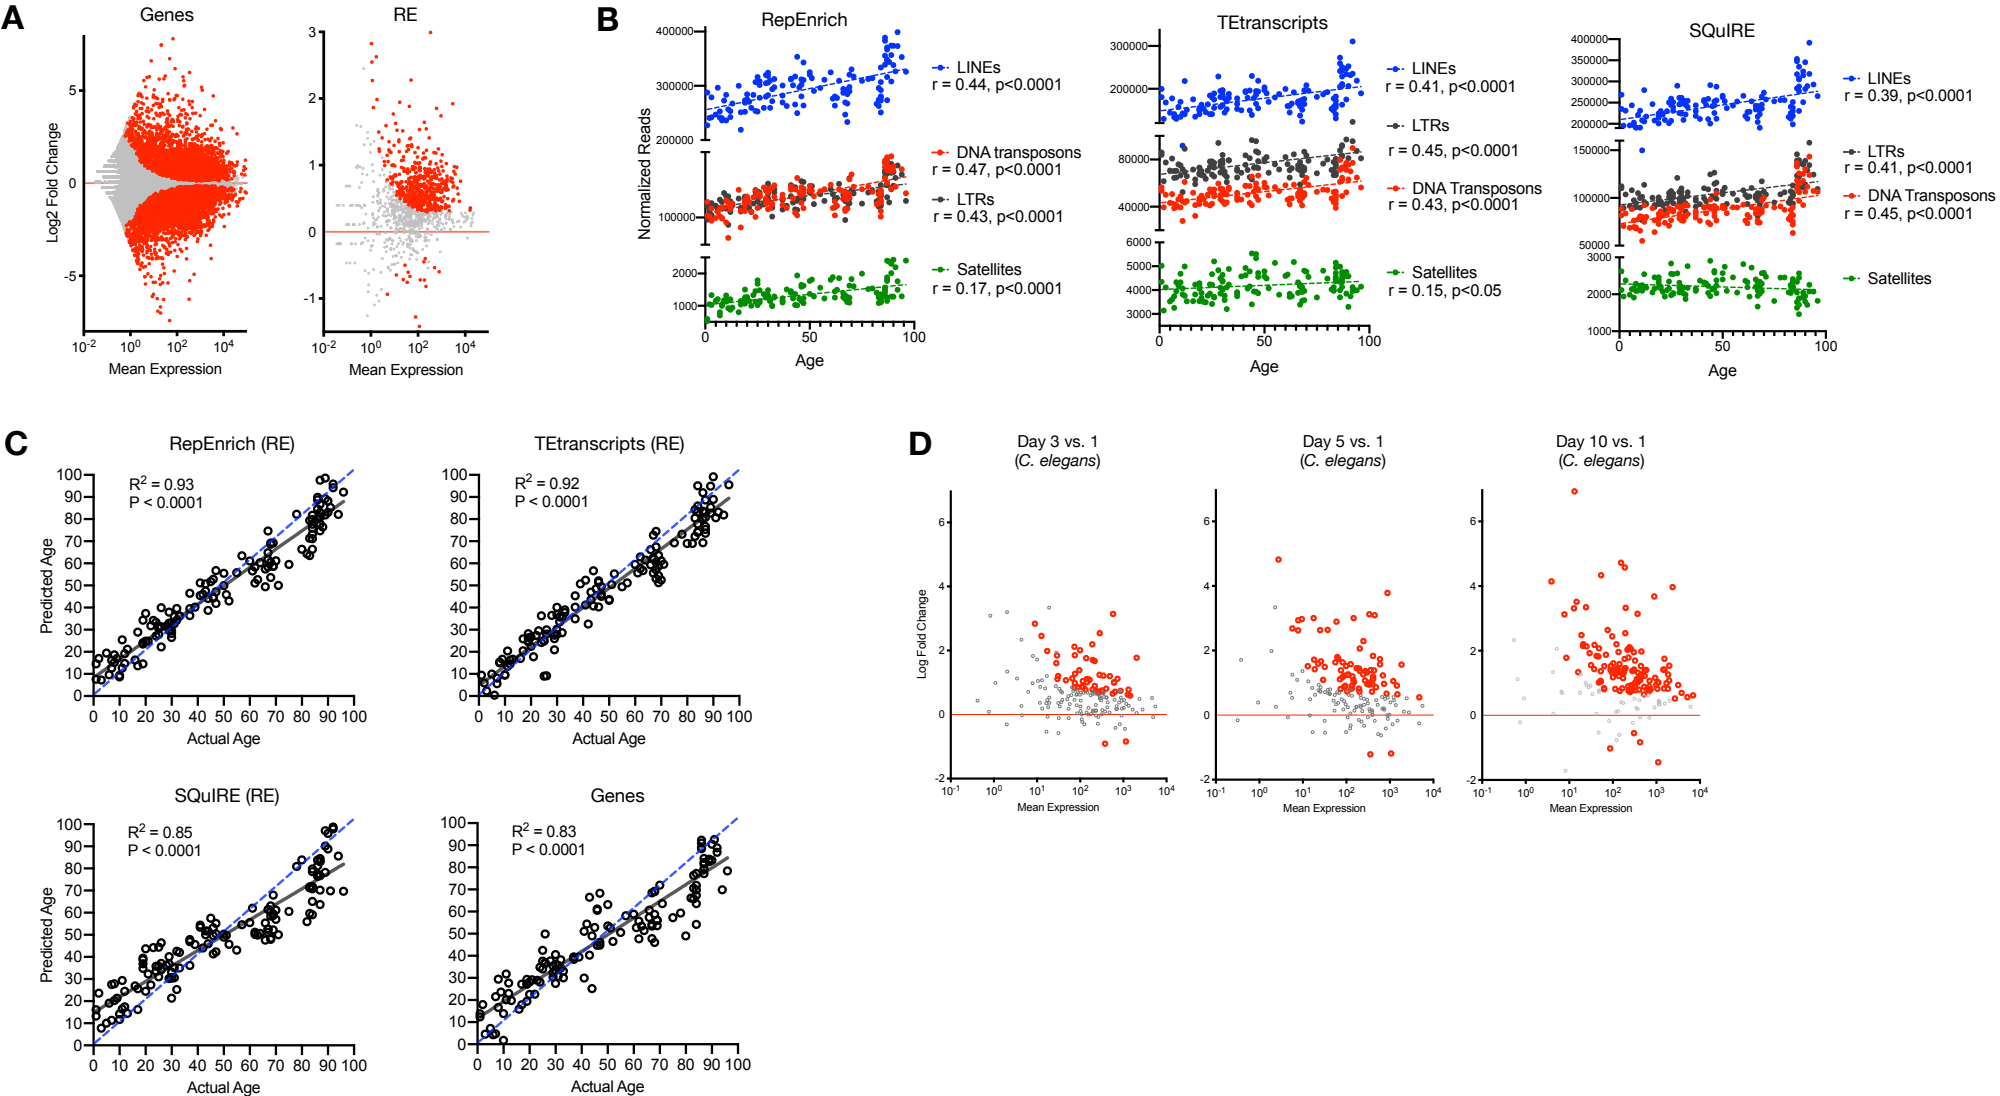

Supplement: ACEL-19-e13167-s001.pdf [file ACEL-19-e13167-s001.pdf]
